# Supplementary material for: Revealing Pan-Histology Immunomodulatory Targets in Pediatric Central Nervous System Tumors
Source: MDPI journal article supplement (doi:10.3390/cancers15225455), 2023-11-17

| Characteristic | Low-grade C3, PFS |                 |                     |              | Low-grade C4, PFS |                 |                     |              | High-grade C4, OS |                 |                     |                  |
|----------------|-------------------|-----------------|---------------------|--------------|-------------------|-----------------|---------------------|--------------|-------------------|-----------------|---------------------|------------------|
|                | N                 | HR <sup>1</sup> | 95% CI <sup>1</sup> | p-value      | N                 | HR <sup>1</sup> | 95% CI <sup>1</sup> | p-value      | N                 | HR <sup>1</sup> | 95% CI <sup>1</sup> | p-value          |
| t cells        | 80                | 0.60            | 0.38, 0.95          | <b>0.030</b> | 104               | 1.35            | 1.00, 1.83          | <b>0.047</b> | 239               | 1.27            | 1.05, 1.52          | <b>0.013</b>     |
| macrophages    | 80                | 1.01            | 0.98, 1.05          | 0.4          | 104               | 1.00            | 0.97, 1.02          | 0.9          | 239               | 0.98            | 0.97, 0.99          | <b>0.003</b>     |
| neutrophils    | 80                | 1.01            | 0.99, 1.02          | 0.5          | 104               | 0.99            | 0.95, 1.02          | 0.4          | 239               | 0.99            | 0.96, 1.02          | 0.5              |
| nK cells       | 80                | 0.59            | 0.23, 1.47          | 0.3          | 104               | 1.19            | 1.03, 1.37          | <b>0.020</b> | 239               | 0.97            | 0.92, 1.03          | 0.3              |
| b cells        | 80                | 2.48            | 0.89, 6.94          | 0.083        | 104               | 0.50            | 0.17, 1.43          | 0.2          | 239               | 0.83            | 0.54, 1.27          | 0.4              |
| proliferation  | 80                | 1.14            | 0.81, 1.59          | 0.4          | 104               | 1.40            | 1.09, 1.81          | <b>0.008</b> | 239               | 1.02            | 0.99, 1.04          | 0.15             |
| Resection      | 80                |                 |                     |              | 104               |                 |                     |              | 239               |                 |                     |                  |
| Biopsy         |                   | —               | —                   |              |                   | —               | —                   |              |                   | —               | —                   |                  |
| GTR            |                   | 0.21            | 0.02, 2.21          | 0.2          |                   | 0.05            | 0.01, 0.37          | <b>0.003</b> |                   | 0.40            | 0.20, 0.78          | <b>0.007</b>     |
| Partial        |                   | 0.45            | 0.04, 4.82          | 0.5          |                   | 0.42            | 0.07, 2.67          | 0.4          |                   | 0.64            | 0.37, 1.11          | 0.11             |
| Diagnosis      |                   |                 |                     |              |                   |                 |                     |              | 239               |                 |                     |                  |
| ATRT           |                   |                 |                     |              |                   |                 |                     |              |                   | —               | —                   |                  |
| CPC            |                   |                 |                     |              |                   |                 |                     |              |                   | 0.56            | 0.12, 2.65          | 0.5              |
| DMG            |                   |                 |                     |              |                   |                 |                     |              |                   | 2.92            | 1.28, 6.66          | <b>0.011</b>     |
| Embryonal      |                   |                 |                     |              |                   |                 |                     |              |                   | 0.24            | 0.07, 0.83          | <b>0.024</b>     |
| Ependymoma     |                   |                 |                     |              |                   |                 |                     |              |                   | 0.20            | 0.08, 0.52          | <b>&lt;0.001</b> |

| Characteristic  | Low-grade C3, PFS |                 |                     |         | Low-grade C4, PFS |                 |                     |         | High-grade C4, OS |                 |                     |         |
|-----------------|-------------------|-----------------|---------------------|---------|-------------------|-----------------|---------------------|---------|-------------------|-----------------|---------------------|---------|
|                 | N                 | HR <sup>1</sup> | 95% CI <sup>1</sup> | p-value | N                 | HR <sup>1</sup> | 95% CI <sup>1</sup> | p-value | N                 | HR <sup>1</sup> | 95% CI <sup>1</sup> | p-value |
| HGG             |                   |                 |                     |         |                   |                 |                     |         |                   | 0.83            | 0.39, 1.73          | 0.6     |
| Medulloblastoma |                   |                 |                     |         |                   |                 |                     |         |                   | 0.26            | 0.13, 0.53          | <0.001  |
| Sarcoma         |                   |                 |                     |         |                   |                 |                     |         |                   | 0.42            | 0.12, 1.44          | 0.2     |

<sup>1</sup>HR = Hazard Ratio, CI = Confidence Interval

**Supplementary Table S1:** Figure 2A full model results demonstrating the HR of the log<sub>2</sub> increase of *Imsig* signature among primary pCNS neoplasms. Results from three separate cox regression models are displayed. Low-grade C3 included N = 80 samples (18 observations deleted due to missingness) with 18 events. Low-grade C4 included samples N = 104 (41 observations deleted due to missingness) with 30 events. High-grade C4 included N = 239 samples (47 observations deleted due to missingness) with 127 events. Low-grade models examined impact of *Imsig* signatures on progression free survival, adjusted for extent of surgical resection. Addition of diagnosis code to the models resulted in failed convergence due to sample size constraints. High-grade C4 model is adjusted for extent of surgical resection and diagnosis code.

# Western blots

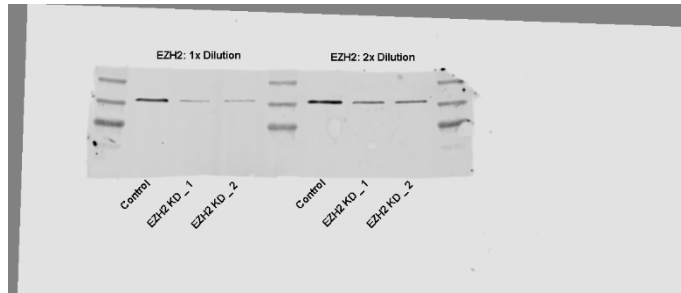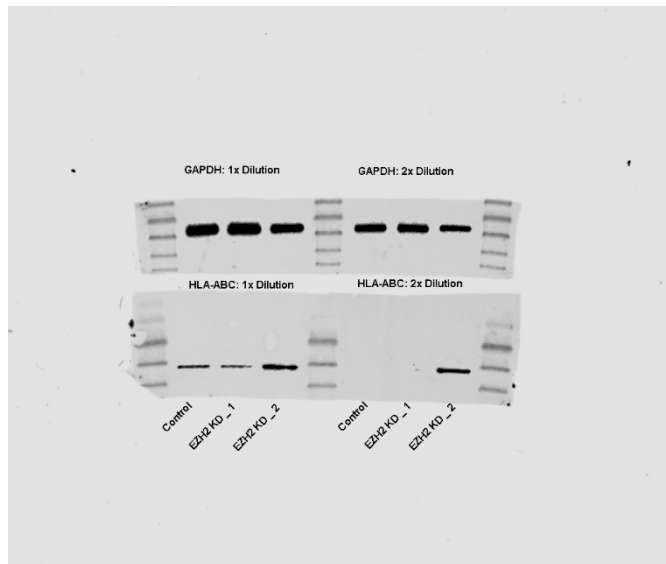

Supplement: s1 [file s1]
